# Supplementary material
Source: PubMed Central journal article supplement (PMC3318551)
Supplement: supp_50.4.1415_JCM-JCM06326-11-s01.pdf [file supp_50.4.1415_JCM-JCM06326-11-s01.pdf]

**Table S1**

Origin of included clinical isolates (N=102) and species distribution at the different sites. Comparison of historical phenotypic identification with 16S rRNA gene sequencing results.

| Species identification by 16S rRNA gene sequencing  | Number | Origin of clinical isolates |       |               |                      |             |                   |        |               | Phenotypic identification                |                                                                          |                                                                 |
|-----------------------------------------------------|--------|-----------------------------|-------|---------------|----------------------|-------------|-------------------|--------|---------------|------------------------------------------|--------------------------------------------------------------------------|-----------------------------------------------------------------|
|                                                     |        | Abdomen                     | Blood | Ear and sinus | Femal genital system | Oro-pharynx | Respiratory tract | Wounds | Miscellaneous | Concordant with 16S rRNA gene sequencing | Incomplete phenotypic or 16s rRNA sequencing results                     | Discordant with 16S rRNA gene sequencing                        |
| <i>P. baroniae</i>                                  | 3      | -                           | -     | -             | -                    | 2           | -                 | -      | 1             | -                                        | 3 ( <i>P.oralis/baroniae</i> )                                           | -                                                               |
| <i>P. bergensis</i>                                 | 2      | -                           | -     | -             | -                    | -           | -                 | 1      | 1             | -                                        | 2 ( <i>Prevotella</i> species)                                           | -                                                               |
| <i>P. bivia</i>                                     | 23     | 6                           | -     | 3             | 5                    | -           | -                 | 8      | 1             | 21                                       | -                                                                        | 2 ( <i>P. tannerae</i> )                                        |
| <i>P. buccae</i>                                    | 10     | 6                           | 1     | 1             | -                    | -           | 2                 | -      | -             | 10                                       | -                                                                        | -                                                               |
| <i>P. buccalis</i>                                  | 3      | -                           | -     | 1             | -                    | -           | -                 | 2      | -             | 1                                        | 1 ( <i>Prevotella</i> species)                                           | 1 ( <i>P. buccae</i> )                                          |
| <i>P. corporis</i>                                  | 3      | 2                           | -     | -             | -                    | -           | -                 | 1      | -             | 1                                        | -                                                                        | 2 (1 <i>P. tannerae</i> and 1 <i>P. intermedia/nigrescens</i> ) |
| <i>P. denticola</i>                                 | 9      | 5                           | 1     | 1             | 1                    | -           | 1                 | -      | -             | 1                                        | 3 ( <i>P.melaninogenica/denticola</i> )                                  | 5 (4 <i>P. melaninogenica</i> and 1 <i>P. buccalis</i> )        |
| <i>P. disiens</i>                                   | 7      | 3                           | -     | 1             | -                    | 1           | -                 | 2      | -             | -                                        | 7 ( <i>P. disiens/marshii</i> )                                          | -                                                               |
| <i>P. heparinolytica</i>                            | 3      | -                           | 1     | -             | -                    | 1           | -                 | 1      | -             | 3                                        | -                                                                        | -                                                               |
| <i>P. histicola</i>                                 | 3      | -                           | -     | -             | -                    | 2           | 1                 | -      | -             | -                                        | -                                                                        | 3 ( <i>P. melaninogenica</i> )                                  |
| <i>P. intermedia</i>                                | 3      | 1                           | -     | -             | -                    | -           | -                 | 2      | -             | -                                        | 3 ( <i>P. intermedia/nigrescens</i> )                                    | -                                                               |
| <i>P. loescheii</i>                                 | 1      | -                           | -     | -             | -                    | 1           | -                 | -      | -             | -                                        | 1 ( <i>Prevotella</i> species)                                           | -                                                               |
| <i>P. melaninogenica</i>                            | 8      | 1                           | -     | 3             | 1                    | 1           | -                 | 2      | -             | 5                                        | 1 ( <i>P. melaninogenica/denticola</i> )                                 | 2 ( <i>P. tannerae</i> )                                        |
| <i>P. nanceiensis</i>                               | 9      | 2                           | 1     | 2             | -                    | -           | 2                 | 1      | 1             | -                                        | 8 (5 <i>P. melaninogenica/denticola</i> and 3 <i>Prevotella</i> species) | 1 ( <i>P. tannerae</i> )                                        |
| <i>P. nigrescens</i>                                | 2      | -                           | 1     | -             | -                    | 1           | -                 | -      | -             | -                                        | 2 ( <i>P. intermedia/nigrescens</i> )                                    | -                                                               |
| <i>P. oralis</i>                                    | 1      | -                           | -     | -             | -                    | -           | -                 | -      | 1             | -                                        | 1 ( <i>P. oralis/baroniae</i> )                                          | -                                                               |
| <i>P. oris</i>                                      | 3      | 1                           | -     | 1             | -                    | -           | -                 | -      | 1             | -                                        | 3 (2 <i>P. oris/salivae</i> and 1 <i>P. oralis/baroniae</i> )            | -                                                               |
| <i>P. salivae</i>                                   | 2      | -                           | -     | -             | -                    | -           | -                 | 1      | 1             | -                                        | 2 ( <i>P. oris/salivae</i> )                                             | -                                                               |
| <i>P. timonensis</i>                                | 2      | 2                           | -     | -             | -                    | -           | -                 | -      | -             | -                                        | 2 ( <i>Prevotella</i> species)                                           | -                                                               |
| <i>P. veroralis</i>                                 | 1      | -                           | -     | -             | 1                    | -           | -                 | -      | -             | -                                        | -                                                                        | 1 ( <i>P. melaninogenica</i> )                                  |
| <i>Prevotella</i> species (“ <i>massiliensis</i> ”) | 1      | -                           | -     | -             | -                    | -           | -                 | 1      | -             | -                                        | 1 ( <i>Prevotella</i> species)                                           | -                                                               |

|                                                                                  |       |       |      |       |      |      |      |       |      |        |                                                                        |       |
|----------------------------------------------------------------------------------|-------|-------|------|-------|------|------|------|-------|------|--------|------------------------------------------------------------------------|-------|
| <i>Prevotella</i><br>species most<br>closely related to<br><i>melaninogenica</i> | 2     | -     | -    | -     | -    | -    | 1    | -     | 1    | -      | 2 (1 <i>P. melaninogenica</i> and 1<br><i>P. melaninogenica</i> group) | -     |
| <i>Prevotella</i><br>species most<br>closely related to<br><i>oralis</i>         | 1     | -     | -    | -     | -    | 1    | -    | -     | -    | -      | 1 ( <i>Prevotella</i> species)                                         | -     |
|                                                                                  | 102   | 29    | 5    | 13    | 8    | 10   | 7    | 22    | 8    | 42     | 43                                                                     | 17    |
|                                                                                  | 100 % | 28.4% | 4.9% | 12.7% | 7.8% | 9.8% | 6.9% | 21.6% | 7.8% | 41.2 % | 42.2%                                                                  | 16.7% |
