# Supplementary material
Source: PubMed Central journal article supplement (PMC3318551)
Supplement: supp_50.4.1415_JCM-JCM06326-11-s02.pdf [file supp_50.4.1415_JCM-JCM06326-11-s02.pdf]

1 **Table S2**

2 Identification by 16S rRNA gene sequencing is compared with MALDI-TOF MS for all isolates included in the study (N=102). Scores  
 3 of MSPs (main spectra) of best matches of the Bruker Reference Library 3.2.1.0 are represented. The Reference Library was extended  
 4 with own MSPs of reference strains and sequenced clinical isolates, if applicable scores are also represented.

| Isolate number | NCBI accession number | 16S rRNA gene sequencing                       |                                     |                               | MALDI-TOF MS results             |                                    |       |                                  |       |                                    |       |
|----------------|-----------------------|------------------------------------------------|-------------------------------------|-------------------------------|----------------------------------|------------------------------------|-------|----------------------------------|-------|------------------------------------|-------|
|                |                       | Identification                                 | NCBI accession number of best match | % of identity with best match | Bruker Reference Library 3.2.1.0 |                                    |       | Own MSPs of Reference strains    |       | MSPs of sequenced clinical strains |       |
|                |                       |                                                |                                     |                               | Species represented in Library   | Best match                         | Score | Best match                       | Score | Best match                         | Score |
| SEQ053         | JN867222              | Still provisionally " <i>P. massiliensis</i> " | AF487886.1                          | 100%                          | No                               | No reliable identification         | <1.7  | N/A                              | N/A   | N/A                                | N/A   |
| SEQ056         | JN867225              | <i>P. baroniae</i>                             | AB547671.1                          | 99.9%                         | Yes                              | <i>P. baroniae</i> HU30410_3 PNU   | 2.106 | <i>P. baroniae</i> DSM 16972 UZB | 2.417 | N/A                                | N/A   |
| SEQ214         | JN867289              | <i>P. baroniae</i>                             | AB547671.1                          | 99.7%                         | Yes                              | <i>P. baroniae</i> HU30410_3 PNU   | 2.065 | <i>P. baroniae</i> DSM 16972 UZB | 2.349 | N/A                                | N/A   |
| SEQ215         | JN867290              | <i>P. baroniae</i>                             | AB547671.1                          | 99.8%                         | Yes                              | <i>P. baroniae</i> HU30410_3 PNU   | 2.135 | <i>P. baroniae</i> DSM 16972 UZB | 2.352 | N/A                                | N/A   |
| SEQ073         | JN867239              | <i>P. bergensis</i>                            | AB547672.1                          | 99.8%                         | Yes                              | <i>P. bergensis</i> DSM 17361T DSM | 2.133 | N/A                              | N/A   | N/A                                | N/A   |
| SEQ221         | JN867296              | <i>P. bergensis</i>                            | AB547672.1                          | 99.8%                         | Yes                              | <i>P. bergensis</i> DSM 17361T DSM | 2.046 | N/A                              | N/A   | N/A                                | N/A   |
| SEQ078         | JN867244              | <i>P. bivia</i>                                | AB547673.1                          | 99.6%                         | Yes                              | <i>P. bivia</i> HU44067_1 PNU      | 2.273 | <i>P. bivia</i> CCUG 9557 UZB    | 2.233 | N/A                                | N/A   |
| SEQ171         | JN867248              | <i>P. bivia</i>                                | AB547674.1                          | 100%                          | Yes                              | <i>P. bivia</i> HU44067_1 PNU      | 2.216 | <i>P. bivia</i> CCUG 9557 UZB    | 2.366 | N/A                                | N/A   |
| SEQ173         | JN867249              | <i>P. bivia</i>                                | AB547674.1                          | 100%                          | Yes                              | <i>P. bivia</i> HU44067_1 PNU      | 2.098 | <i>P. bivia</i> CCUG 9557 UZB    | 2.391 | N/A                                | N/A   |
| SEQ174         | JN867250              | <i>P. bivia</i>                                | AB547674.1                          | 100%                          | Yes                              | <i>P. bivia</i> 0807M220682 IBS    | 2.131 | <i>P. bivia</i> CCUG 9557 UZB    | 2.291 | N/A                                | N/A   |
| SEQ175         | JN867251              | <i>P. bivia</i>                                | AB547674.1                          | 100%                          | Yes                              | <i>P. bivia</i> HU44067_1 PNU      | 2.313 | <i>P. bivia</i> CCUG 9557 UZB    | 2.253 | N/A                                | N/A   |
| SEQ184         | JN867259              | <i>P. bivia</i>                                | AB547674.1                          | 99.9%                         | Yes                              | <i>P. bivia</i> 0807M220682 IBS    | 2.035 | <i>P. bivia</i> CCUG 9557 UZB    | 2.234 | N/A                                | N/A   |
| SEQ185         | JN867260              | <i>P. bivia</i>                                | AB547674.1                          | 100%                          | Yes                              | <i>P. bivia</i> HU44067_1 PNU      | 2.011 | <i>P. bivia</i> CCUG 9557 UZB    | 2.291 | N/A                                | N/A   |
| SEQ187         | JN867262              | <i>P. bivia</i>                                | AB547674.1                          | 100%                          | Yes                              | <i>P. bivia</i> HU44067_1 PNU      | 2.145 | <i>P. bivia</i> CCUG 9557 UZB    | 2.264 | N/A                                | N/A   |
| SEQ190         | JN867265              | <i>P. bivia</i>                                | AB547674.1                          | 99.9%                         | Yes                              | <i>P. bivia</i> HU44067_1 PNU      | 2.170 | <i>P. bivia</i> CCUG 9557 UZB    | 2.362 | N/A                                | N/A   |
| SEQ192         | JN867267              | <i>P. bivia</i>                                | AB547673.1                          | 99.9%                         | Yes                              | <i>P. bivia</i> HU44067_1 PNU      | 2.017 | <i>P. bivia</i> CCUG 9557 UZB    | 2.279 | N/A                                | N/A   |
| SEQ195         | JN867270              | <i>P. bivia</i>                                | AB547674.1                          | 100%                          | Yes                              | <i>P. bivia</i> DSM 20514T DSM     | 1.983 | <i>P. bivia</i> CCUG 9557 UZB    | 2.182 | N/A                                | N/A   |

|        |          |                    |            |       |     |                            |       |                          |       |                                                          |                |
|--------|----------|--------------------|------------|-------|-----|----------------------------|-------|--------------------------|-------|----------------------------------------------------------|----------------|
| SEQ198 | JN867273 | <i>P. bivia</i>    | AB547674.1 | 99.9% | Yes | P. bivia HU44067_1 PNU     | 2.157 | P. bivia CCUG 9557 UZB   | 2.251 | N/A                                                      | N/A            |
| SEQ199 | JN867274 | <i>P. bivia</i>    | AB547674.1 | 99.9% | Yes | P. bivia HU44067_1 PNU     | 2.088 | P. bivia CCUG 9557 UZB   | 2.312 | N/A                                                      | N/A            |
| SEQ204 | JN867279 | <i>P. bivia</i>    | AB547674.1 | 100%  | Yes | P. bivia HU26382 PNU       | 1.957 | P. bivia CCUG 9557 UZB   | 2.345 | N/A                                                      | N/A            |
| SEQ227 | JN867300 | <i>P. bivia</i>    | AB547674.1 | 99.9% | Yes | P. bivia HU26382 PNU       | 2.133 | P. bivia CCUG 9557 UZB   | 2.109 | N/A                                                      | N/A            |
| SEQ228 | JN867301 | <i>P. bivia</i>    | AB547673.1 | 99.9% | Yes | P. bivia HU44067_1 PNU     | 2.073 | P. bivia CCUG 9557 UZB   | 2.228 | N/A                                                      | N/A            |
| SEQ229 | JN867302 | <i>P. bivia</i>    | AB547674.1 | 100%  | Yes | P. bivia HU26382 PNU       | 2.134 | P. bivia CCUG 9557 UZB   | 2.356 | N/A                                                      | N/A            |
| SEQ232 | JN867305 | <i>P. bivia</i>    | AB547673.1 | 99.9% | Yes | P. bivia DSM 20514T DSM    | 1.888 | P. bivia CCUG 9557 UZB   | 2.151 | N/A                                                      | N/A            |
| SEQ234 | JN867307 | <i>P. bivia</i>    | AB547674.1 | 99.9% | Yes | P. bivia DSM 20514T DSM    | 2.052 | P. bivia CCUG 9557 UZB   | 2.205 | N/A                                                      | N/A            |
| SEQ238 | JN867311 | <i>P. bivia</i>    | AB547674.1 | 100%  | Yes | P. bivia HU44067_1 PNU     | 2.071 | P. bivia CCUG 9557 UZB   | 2.279 | N/A                                                      | N/A            |
| SEQ239 | JN867312 | <i>P. bivia</i>    | AB547674.1 | 99.9% | Yes | P. bivia HU44067_1 PNU     | 2.230 | P. bivia CCUG 9557 UZB   | 2.228 | N/A                                                      | N/A            |
| SEQ241 | JN867314 | <i>P. bivia</i>    | AB547674.1 | 100%  | Yes | P. bivia DSM 20514T DSM    | 1.989 | P. bivia CCUG 9557 UZB   | 2.146 | N/A                                                      | N/A            |
| SEQ245 | JN867318 | <i>P. bivia</i>    | AB547674.1 | 99.9% | Yes | P. bivia HU44067_1 PNU     | 2.124 | P. bivia CCUG 9557 UZB   | 2.264 | N/A                                                      | N/A            |
| SEQ180 | JN867256 | <i>P. buccae</i>   | AB547675.1 | 99.9% | Yes | P. buccae DSM 20615 DSM    | 2.148 | N/A                      | N/A   | N/A                                                      | N/A            |
| SEQ181 | JN867257 | <i>P. buccae</i>   | AB547675.1 | 99.9% | Yes | P. buccae DSM 20615 DSM    | 2.005 | N/A                      | N/A   | N/A                                                      | N/A            |
| SEQ191 | JN867266 | <i>P. buccae</i>   | AB547675.1 | 99.9% | Yes | P. buccae HU21568_4 PNU    | 2.213 | N/A                      | N/A   | N/A                                                      | N/A            |
| SEQ194 | JN867269 | <i>P. buccae</i>   | AB547675.1 | 99.6% | Yes | P. buccae DSM 20615 DSM    | 2.240 | N/A                      | N/A   | N/A                                                      | N/A            |
| SEQ205 | JN867280 | <i>P. buccae</i>   | AB547675.1 | 99.8% | Yes | P. buccae HU47210_2 PNU    | 2.295 | N/A                      | N/A   | N/A                                                      | N/A            |
| SEQ207 | JN867282 | <i>P. buccae</i>   | AB547675.1 | 99.8% | Yes | P. buccae HU21568_4 PNU    | 2.161 | N/A                      | N/A   | N/A                                                      | N/A            |
| SEQ208 | JN867283 | <i>P. buccae</i>   | AB547675.1 | 99.9% | Yes | P. buccae HU21568_4 PNU    | 2.204 | N/A                      | N/A   | N/A                                                      | N/A            |
| SEQ225 | JN867298 | <i>P. buccae</i>   | AB547675.1 | 99.7% | Yes | P. buccae HU21568_4 PNU    | 2.200 | N/A                      | N/A   | N/A                                                      | N/A            |
| SEQ230 | JN867303 | <i>P. buccae</i>   | AB547675.1 | 99.9% | Yes | P. buccae HU21568_4 PNU    | 2.335 | N/A                      | N/A   | N/A                                                      | N/A            |
| SEQ243 | JN867316 | <i>P. buccae</i>   | AB547675.1 | 99.6% | Yes | P. buccae DSM 20615 DSM    | 2.152 | N/A                      | N/A   | N/A                                                      | N/A            |
| SEQ057 | JN867226 | <i>P. buccalis</i> | AB547676.1 | 99.9% | Yes | No reliable identification | <1.7  | N/A                      | N/A   | P. buccalis UZB SEQ077 UZB<br>P. buccalis UZB SEQ057 UZB | 1.728<br>2.254 |
| SEQ077 | JN867243 | <i>P. buccalis</i> | AB547676.1 | 99.8% | Yes | No reliable identification | <1.7  | N/A                      | N/A   | P. buccalis UZB SEQ057 UZB<br>P. buccalis UZB SEQ077 UZB | 1.703<br>2.27  |
| SEQ186 | JN867261 | <i>P. buccalis</i> | AB547676.1 | 99.9% | Yes | P. buccalis DSM 20616T DSM | 1.990 | N/A                      | N/A   | P. buccalis UZB.SEQ057 UZB                               | 2.286          |
| SEQ176 | JN867252 | <i>P. corporis</i> | AB547677.1 | 99.9% | Yes | P. corporis DSM 18810T DSM | 2.100 | P.corporis DSM 18810 UZB | 2.025 | N/A                                                      | N/A            |

|        |          |                          |             |       |     |                              |       |                              |       |                                      |       |
|--------|----------|--------------------------|-------------|-------|-----|------------------------------|-------|------------------------------|-------|--------------------------------------|-------|
| SEQ179 | JN867255 | <i>P. corporis</i>       | AB547677.1  | 99.6% | Yes | P. corporis DSM 18810T DSM   | 2.068 | P.corporis DSM 18810 UZB     | 1.863 | N/A                                  | N/A   |
| SEQ196 | JN867271 | <i>P. corporis</i>       | AB547677.1  | 99.8% | Yes | P. corporis DSM 18810T DSM   | 2.134 | P.corporis DSM 18810 UZB     | 1.831 | N/A                                  | N/A   |
| SEQ063 | JN867232 | <i>P. denticola</i>      | AB547679.1  | 99.0% | No  | No reliable identification   | <1.7  | P. denticola DSM 20614 UZB   | 2.352 | N/A                                  | N/A   |
| SEQ076 | JN867242 | <i>P. denticola</i>      | CP002589.1  | 99.9% | No  | No reliable identification   | <1.7  | P. denticola DSM 20614 UZB   | 2.256 | N/A                                  | N/A   |
| SEQ188 | JN867263 | <i>P. denticola</i>      | AB547680.1  | 99.9% | No  | No reliable identification   | <1.7  | P. denticola DSM 20614 UZB   | 2.377 | N/A                                  | N/A   |
| SEQ197 | JN867272 | <i>P. denticola</i>      | AB547679.1  | 99.8% | No  | No reliable identification   | <1.7  | P. denticola DSM 20614 UZB   | 2.030 | N/A                                  | N/A   |
| SEQ200 | JN867275 | <i>P. denticola</i>      | AB547680.1  | 99.7% | No  | No reliable identification   | <1.7  | P. denticola DSM 20614 UZB   | 2.159 | N/A                                  | N/A   |
| SEQ202 | JN867277 | <i>P. denticola</i>      | AB547679.1  | 99.7% | No  | No reliable identification   | <1.7  | P. denticola DSM 20614 UZB   | 2.231 | N/A                                  | N/A   |
| SEQ206 | JN867281 | <i>P. denticola</i>      | CP002589.1  | 99.8% | No  | No reliable identification   | <1.7  | P. denticola DSM 20614 UZB   | 2.136 | N/A                                  | N/A   |
| SEQ210 | JN867285 | <i>P. denticola</i>      | AB547679.1  | 99.8% | No  | No reliable identification   | <1.7  | P. denticola DSM 20614 UZB   | 2.223 | N/A                                  | N/A   |
| SEQ247 | JN867320 | <i>P. denticola</i>      | AB547680.1  | 99.9% | No  | No reliable identification   | <1.7  | P. denticola DSM 20614 UZB   | 2.068 | N/A                                  | N/A   |
| SEQ058 | JN867227 | <i>P. disiens</i>        | AB547682.1  | 99.9% | Yes | P. disiens HU28371_5 PNU     | 2.165 | P. disiens CCUG 9558 UZB     | 1.94  | N/A                                  | N/A   |
| SEQ177 | JN867253 | <i>P. disiens</i>        | AB547682.1  | 100%  | Yes | P. disiens HU28371_5 PNU     | 2.156 | P.disiens CCUG 9558 UZB      | 2.154 | N/A                                  | N/A   |
| SEQ178 | JN867254 | <i>P. disiens</i>        | AB547682.1  | 99.8% | Yes | P. disiens HU28371_5 PNU     | 2.352 | P.disiens CCUG 9558 UZB      | 2.207 | N/A                                  | N/A   |
| SEQ201 | JN867276 | <i>P. disiens</i>        | AB547682.1  | 99.9% | Yes | P. disiens HU28371_5 PNU     | 2.224 | P.disiens CCUG 9558 UZB      | 2.09  | N/A                                  | N/A   |
| SEQ216 | JN867291 | <i>P. disiens</i>        | AB547682.1  | 100%  | Yes | P. disiens HU28371_5 PNU     | 2.165 | P. disiens CCUG 9558 UZB     | 2.039 | N/A                                  | N/A   |
| SEQ226 | JN867299 | <i>P. disiens</i>        | AB547682.1  | 99.6% | Yes | P. disiens HU28371_5 PNU     | 2.174 | P. disiens CCUG 9558 UZB     | 2.075 | N/A                                  | N/A   |
| SEQ233 | JN867306 | <i>P. disiens</i>        | AB547682.1  | 99.1% | Yes | P. disiens DSM 20516T DSM    | 2.081 | P. disiens CCUG 9558 UZB     | 1.939 | N/A                                  | N/A   |
| SEQ003 | JN867221 | <i>P. heparinolytica</i> | NR_044633.1 | 99.6% | No  | No reliable identification   | <1.7  | N/A                          | N/A   | P. heparinolytica UZB<br>SEQ003 UZB  | 2.617 |
| SEQ209 | JN867284 | <i>P. heparinolytica</i> | NR_044633.1 | 99.5% | No  | No reliable identification   | <1.7  | N/A                          | N/A   | P. heparinolytica UZB.<br>SEQ003 UZB | 2.175 |
| SEQ218 | JN867293 | <i>P. heparinolytica</i> | NR_044633.1 | 99.8% | No  | No reliable identification   | <1.7  | N/A                          | N/A   | P. heparinolytica UZB.<br>SEQ003 UZB | 2.273 |
| SEQ075 | JN867241 | <i>P. histicola</i>      | AB547685.1  | 99.8% | No  | No reliable identification   | <1.7  | P. histicola DSM 19854 UZB   | 2.417 | N/A                                  | N/A   |
| SEQ231 | JN867304 | <i>P. histicola</i>      | AB547685.1  | 99.8% | No  | No reliable identification   | <1.7  | P. histicola DSM 19854 UZB   | 2.132 | N/A                                  | N/A   |
| SEQ242 | JN867315 | <i>P. histicola</i>      | AB547685.1  | 99.7% | No  | No reliable identification   | <1.7  | P. histicola DSM 19854 UZB   | 2.296 | N/A                                  | N/A   |
| SEQ067 | JN867235 | <i>P. intermedia</i>     | AY689226.1  | 99.7% | Yes | P. intermedia DSM 20706T DSM | 2.061 | P. intermedia CCUG 24041 UZB | 2.067 | N/A                                  | N/A   |
| SEQ193 | JN867268 | <i>P. intermedia</i>     | AY689225.1  | 99.6% | Yes | P. intermedia DSM 20706T DSM | 2.030 | P. intermedia CCUG 24041 UZB | 2.012 | N/A                                  | N/A   |
| SEQ223 | JN867297 | <i>P. intermedia</i>     | AY689225.1  | 99.6% | Yes | P. intermedia DSM 20706T DSM | 2.263 | P. intermedia CCUG 24041 UZB | 2.05  | N/A                                  | N/A   |
| SEQ062 | JN867231 | <i>P. loescheii</i>      | AB547689.1  | 99.6% | No  | No reliable identification   | <1.7  | P. loescheii DSM 19665 UZB   | 2.025 | P. loescheii SEQ062 UZB              | 2.339 |

|        |          |                          |             |       |     |                                 |       |                                  |       |                             |       |
|--------|----------|--------------------------|-------------|-------|-----|---------------------------------|-------|----------------------------------|-------|-----------------------------|-------|
| SEQ074 | JN867240 | <i>P. melaninogenica</i> | CP002122.1  | 99.9% | Yes | P. melaninogenica IBS_MS_43 IBS | 2.261 | P. melaninogenica CCUG4944B UZB  | 2.156 | N/A                         | N/A   |
| SEQ115 | JN867245 | <i>P. melaninogenica</i> | FJ792538.1  | 99.6% | Yes | No reliable identification      | <1.7  | No reliable identification       | <1.7  | N/A                         | N/A   |
| SEQ117 | JN867247 | <i>P. melaninogenica</i> | CP002122.1  | 99.5% | Yes | P. melaninogenica IBS_MS_43 IBS | 2.113 | P. melaninogenica CCUG 4944B UZB | 1.804 | N/A                         | N/A   |
| SEQ182 | JN867258 | <i>P. melaninogenica</i> | CP002123.1  | 99.9% | Yes | P. melaninogenica IBS_MS_43 IBS | 2.195 | P. melaninogenica CCUG4944B UZB  | 2.024 | N/A                         | N/A   |
| SEQ189 | JN867264 | <i>P. melaninogenica</i> | CP002122.1  | 99.6% | Yes | P. melaninogenica IBS_MS_43 IBS | 1.920 | P. melaninogenica CCUG 4944B UZB | 1.864 | N/A                         | N/A   |
| SEQ220 | JN867295 | <i>P. melaninogenica</i> | CP002122.1  | 99.9% | Yes | P. melaninogenica IBS_MS_43 IBS | 2.238 | P. melaninogenica CCUG 4944B UZB | 1.925 | N/A                         | N/A   |
| SEQ236 | JN867309 | <i>P. melaninogenica</i> | CP002122.1  | 99.7% | Yes | P. melaninogenica IBS_MS_43 IBS | 2.051 | P. melaninogenica CCUG 4944B UZB | 2.016 | N/A                         | N/A   |
| SEQ244 | JN867317 | <i>P. melaninogenica</i> | CP002122.1  | 99.7% | Yes | P. melaninogenica IBS_MS_43 IBS | 2.181 | P. melaninogenica CCUG 4944B UZB | 2.095 | N/A                         | N/A   |
| SEQ059 | JN867228 | <i>P. nanceiensis</i>    | AB547695.1  | 99.8% | Yes | P. nanceiensis DSM 19126T DSM   | 2.076 | P. nanceiensis DSM 19126 UZB     | 2.135 | N/A                         | N/A   |
| SEQ203 | JN867278 | <i>P. nanceiensis</i>    | AB547695.1  | 99.6% | Yes | P. nanceiensis IBS_MS_20 IBS    | 2.07  | P. nanceiensis DSM 19126 UZB     | 1.937 | N/A                         | N/A   |
| SEQ211 | JN867286 | <i>P. nanceiensis</i>    | AB547695.1  | 99.7% | Yes | P. nanceiensis DSM 19126T DSM   | 2.234 | P.nanceiensis DSM 19126 UZB      | 2.183 | N/A                         | N/A   |
| SEQ213 | JN867288 | <i>P. nanceiensis</i>    | AB547695.1  | 99.7% | Yes | P. nanceiensis DSM 19126T DSM   | 2.207 | P. nanceiensis DSM 19126 UZB     | 2.161 | N/A                         | N/A   |
| SEQ219 | JN867294 | <i>P. nanceiensis</i>    | AB547695.1  | 99.7% | Yes | P. nanceiensis IBS_MS_20 IBS    | 2.125 | P. nanceiensis DSM 19126 UZB     | 2.112 | N/A                         | N/A   |
| SEQ235 | JN867308 | <i>P. nanceiensis</i>    | AB547695.1  | 99.8% | Yes | P. nanceiensis IBS_MS_20 IBS    | 1.832 | P. nanceiensis DSM 19126 UZB     | 2.078 | N/A                         | N/A   |
| SEQ237 | JN867310 | <i>P. nanceiensis</i>    | AB547695.1  | 99.6% | Yes | P. nanceiensis DSM 19126T DSM   | 2.164 | P. nanceiensis DSM 19126 UZB     | 2.286 | N/A                         | N/A   |
| SEQ240 | JN867313 | <i>P. nanceiensis</i>    | AB547695.1  | 99.9% | Yes | P. nanceiensis DSM 19126T DSM   | 1.952 | P. nanceiensis DSM 19126 UZB     | 1.992 | N/A                         | N/A   |
| SEQ246 | JN867319 | <i>P. nanceiensis</i>    | AB547695.1  | 99.6% | Yes | P. nanceiensis DSM 19126T DSM   | 1.962 | P. nanceiensis DSM 19126 UZB     | 2.075 | N/A                         | N/A   |
| SEQ070 | JN867236 | <i>P. nigrescens</i>     | GU470890.1  | 99.6% | Yes | P. nigrescens DSM 13386T DSM    | 2.149 | N/A                              | N/A   | N/A                         | N/A   |
| SEQ222 | JN867322 | <i>P. nigrescens</i>     | GU470890.1  | 99.4% | Yes | P. nigrescens DSM 13386T DSM    | 2.045 | N/A                              | N/A   | N/A                         | N/A   |
| SEQ054 | JN867223 | <i>P. oralis</i>         | AB547698.1  | 99.6% | Yes | P. oralis DSM 20702T DSM        | 1.754 | N/A                              | N/A   | P. oralis UZB SEQ054 UZB    | 2.252 |
| SEQ060 | JN867229 | <i>P. oris</i>           | AB547701.1  | 99.8% | Yes | P. oris DSM 18711T DSM          | 2.114 | P. oris CCUG 15405 UZB           | 2.355 | N/A                         | N/A   |
| SEQ217 | JN867292 | <i>P. oris</i>           | AB547701.1  | 99.7% | Yes | P. oris DSM 18711T DSM          | 2.290 | P. oris CCUG 15405 UZB           | 2.207 | N/A                         | N/A   |
| SEQ212 | JN867287 | <i>P. oris</i>           | GQ131410.1  | 99.9% | Yes | P. oris DSM 18711T DSM          | 2.424 | P.oris CCUG 15405 UZB            | 2.407 | N/A                         | N/A   |
| SEQ064 | JN867233 | <i>P. salivae</i>        | NR_024816.1 | 99.9% | Yes | No reliable identification      | <1.7  | N/A                              | N/A   | P. salivae UZB SEQ071 UZB   | 1.904 |
| SEQ071 | JN867237 | <i>P. salivae</i>        | NR_024816.1 | 99.0% | Yes | No reliable identification      | <1.7  | N/A                              | N/A   | P. salivae UZB SEQ071 UZB   | 2.376 |
| SEQ055 | JN867224 | <i>P. timonensis</i>     | AB547706.1  | 99.9% | No  | No reliable identification      | <1.7  | P. timonensis DSM 22865 UZB      | 2.069 | N/A                         | N/A   |
| SEQ251 | JN867321 | <i>P. timonensis</i>     | AB547706.1  | 99.9% | No  | No reliable identification      | <1.7  | P. timonensis DSM 22865 UZB      | 2.107 | N/A                         | N/A   |
| SEQ061 | JN867230 | <i>P. veroralis</i>      | GQ131418.1  | 99.7% | No  | No reliable identification      | <1.7  | P. veroralis CCUG 15422 UZB      | 1.937 | P. veroralis UZB SEQ061 UZB | 2.210 |

|        |          |                                                               |            |       |    |                            |       |     |     |                          |       |
|--------|----------|---------------------------------------------------------------|------------|-------|----|----------------------------|-------|-----|-----|--------------------------|-------|
| SEQ065 | JN867234 | <i>Prevotella most closely related to "P. melaninogenica"</i> | CP002122.1 | 98.5% | No | No reliable identification | <1.7  | N/A | N/A | N/A                      | N/A   |
| SEQ116 | JN867246 | <i>Prevotella most closely related to "P. melaninogenica"</i> | CP002122.1 | 98.7% | No | No reliable identification | <1.7  | NA  | N/A | N/A                      | N/A   |
| SEQ072 | JN867238 | <i>Prevotella most closely related to "P. oralis"</i>         | AB547698.1 | 97.7% | No | P. oralis DSM 20702T DSM   | 1.743 | N/A | N/A | P. oralis UZB SEQ054 UZB | 1.829 |

5

N/A : not applicable

6
